# Supplementary material for: Unseasonal atmospheric river drives anomalous glacier accumulation in the ablation season of the subtropical Andes
Source: Copernicus journal article supplement (doi:10.5194/egusphere-2024-1958), 2024-07-22
Supplement: Supplementary file 1 [file egusphere-2024-1958-supplement.pdf]

## Supplementary Material

# Unseasonal atmospheric river drives anomalous glacier accumulation in the ablation season of the subtropical Andes

Claudio Bravo<sup>1</sup>, Sebastián Cisternas<sup>1</sup>, Maximiliano Viale<sup>2</sup>, Pablo Paredes<sup>1</sup>, Deniz Bozkurt<sup>3,4,5</sup>, Nicolás García-Lee<sup>1</sup>

<sup>1</sup>Centro de Estudios Científicos, Valdivia, Chile.

<sup>2</sup>Instituto Argentino de Nivología, Glaciología y Ciencias Ambientales, Mendoza, Argentina.

<sup>3</sup>Departamento de Meteorología, Universidad de Valparaíso, Valparaíso, Chile.

<sup>4</sup>Centro de Ciencia del Clima y Resiliencia, Santiago, Chile.

<sup>5</sup>Center for Oceanographic Research COPAS COASTAL, Universidad de Concepción, Concepción, Chile

Correspondence to: Claudio Bravo (cbravo@cecs.cl)

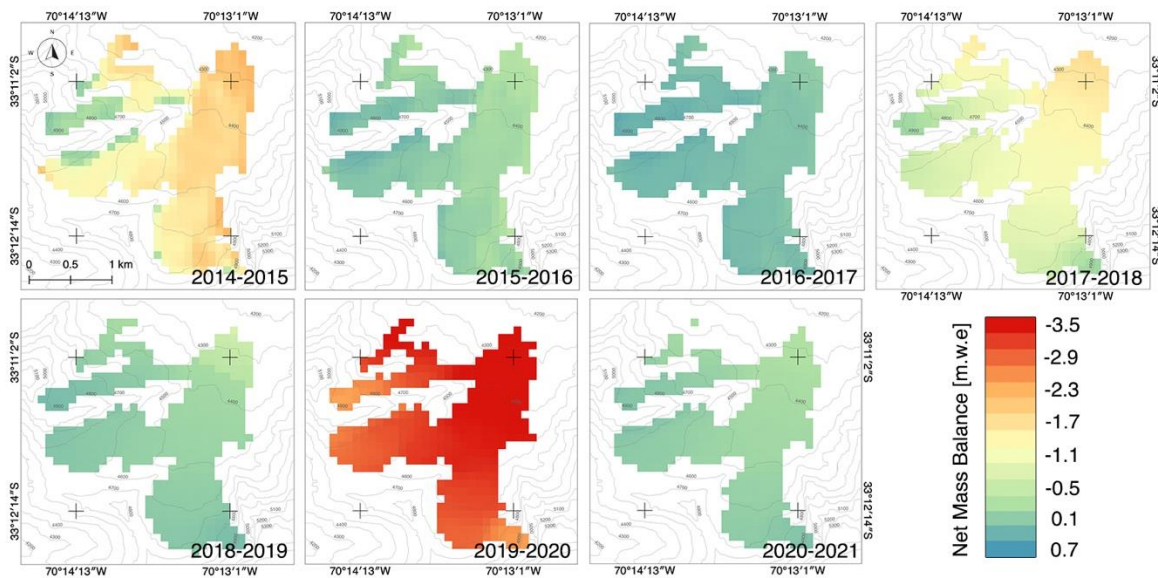

**Figure S1.** Accumulated distributed surface mass balance of the Olivares-Alfa glacier between 2014 and 2021.

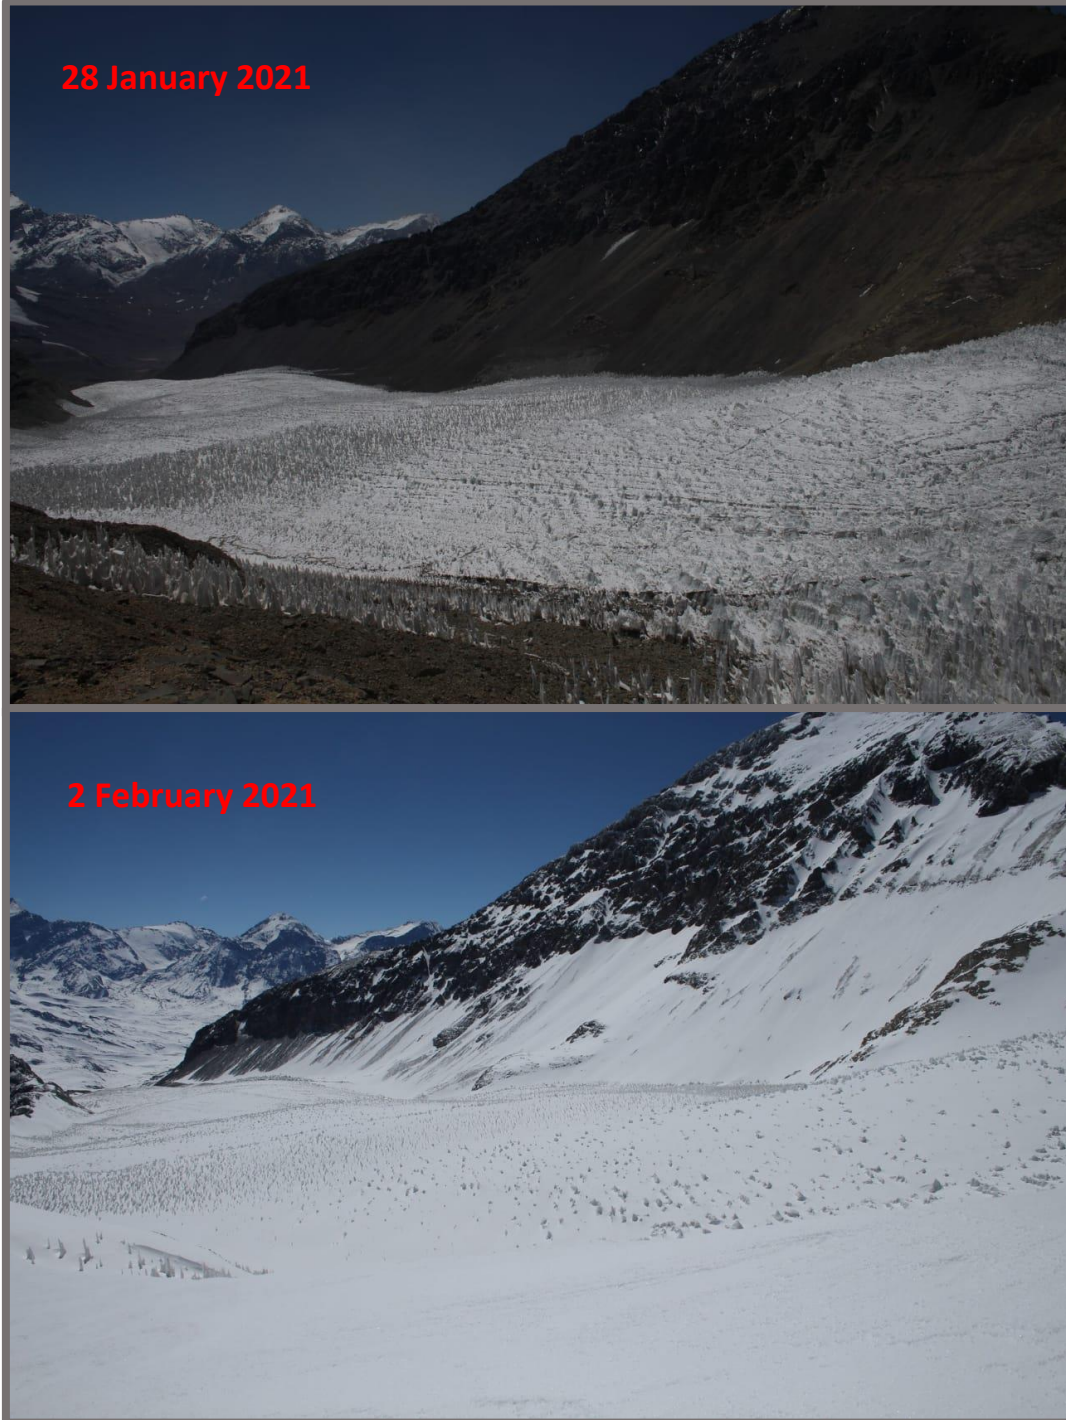

**Figure S2. Pre and post event pictures of the Paloma Norte Glacier, located in the Olivares sub-basin, nearby to Olivares Alfa Glacier (see Fig. 1).**

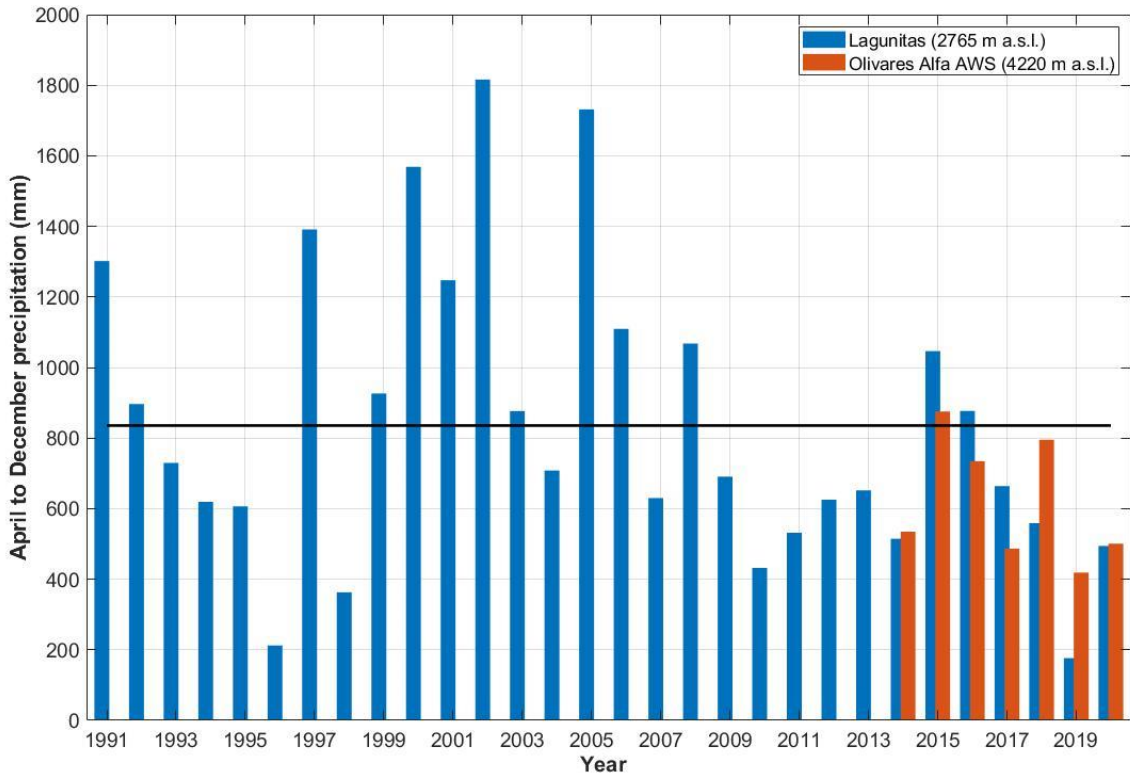

**Figure S3. Accumulated precipitation between April and December for Lagunitas meteorological station and Olivares Alfa AWS. Black line is the climatological mean (1991-2020) of the Lagunitas meteorological station.**

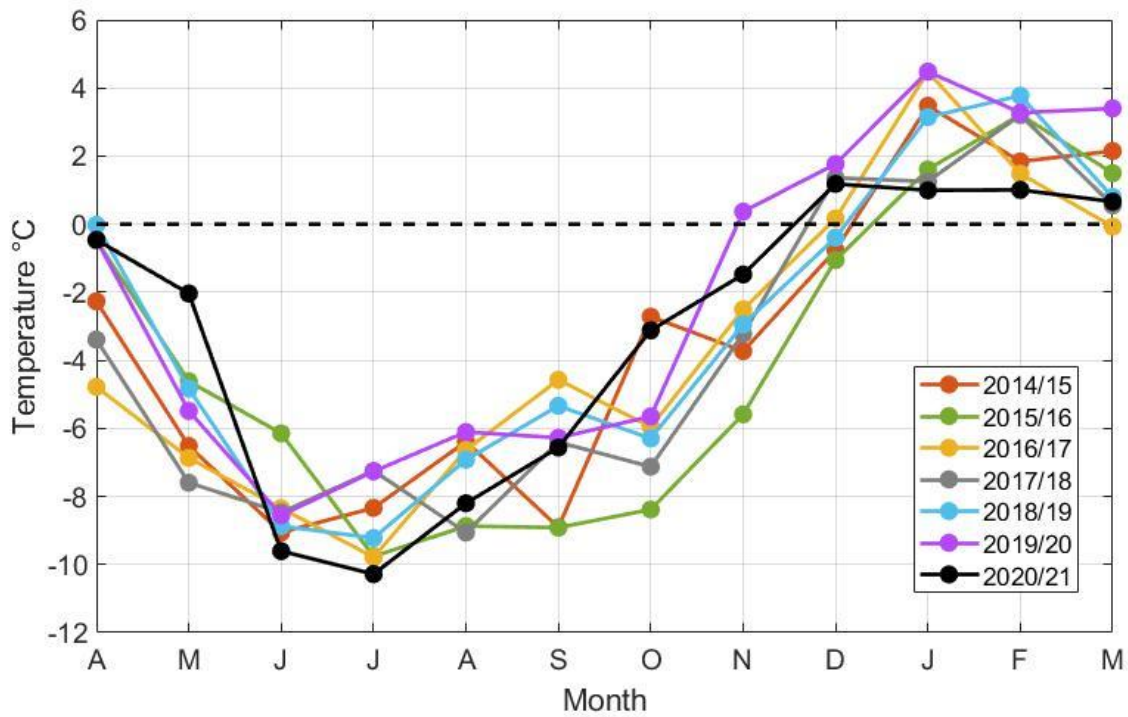

**Figure S4. Monthly mean air temperature recorded at the Olivares Alfa AWS.**

**Table S1. Atmospheric rivers catalogue with ERA5 reanalyses for the period April 2013 to March 2021.**

| Number       | Start            |          | End         |          | Duration (hours) | Latitude range |     | AR Cat_Max | Int max (kg m <sup>-1</sup> s <sup>-1</sup> ) |
|--------------|------------------|----------|-------------|----------|------------------|----------------|-----|------------|-----------------------------------------------|
|              | Day              | Time     | Day         | Time     |                  |                |     |            |                                               |
| 1            | 02-may-13        | 9:00:00  | 03-may-13   | 13:00:00 | 28               | -35            | -31 | 2          | 673.2                                         |
| 2            | 17-may-13        | 16:00:00 | 19-may-13   | 0:00:00  | 32               | -35            | -30 | 1          | 555.6                                         |
| 3            | 27-may-13        | 2:00:00  | 28-may-13   | 21:00:00 | 43               | -35            | -30 | 2          | 695.7                                         |
| 4            | 30-may-13        | 22:00:00 | 31-may-13   | 12:00:00 | 14               | -35            | -34 | 1          | 662.3                                         |
| 5            | 26-jun-13        | 21:00:00 | 28-jun-13   | 12:00:00 | 39               | -35            | -31 | 2          | 685.3                                         |
| 6            | 02-jul-13        | 18:00:00 | 06-jul-13   | 1:00:00  | 55               | -35            | -30 | 2          | 613.7                                         |
| 7            | 08-jul-13        | 22:00:00 | 10-jul-13   | 8:00:00  | 34               | -35            | -32 | 2          | 521.8                                         |
| 8            | 13-jul-13        | 13:00:00 | 14-jul-13   | 15:00:00 | 26               | -35            | -31 | 0          | 292.6                                         |
| 9            | 26-jul-13        | 1:00:00  | 26-jul-13   | 23:00:00 | 22               | -35            | -30 | 1          | 682.3                                         |
| 10           | 06-Aug-2013      | 16:00:00 | 07-Aug-2013 | 22:00:00 | 30               | -35            | -30 | 1          | 565.5                                         |
| 11           | 11-Aug-2013      | 1:00:00  | 12-Aug-2013 | 0:00:00  | 23               | -35            | -32 | 0          | 460.3                                         |
| 12           | 06-sept-13       | 6:00:00  | 07-sept-13  | 12:00:00 | 25               | -35            | -30 | 0          | 391                                           |
| 13           | 09-sept-13       | 15:00:00 | 10-sept-13  | 22:00:00 | 31               | -35            | -35 | 1          | 402.9                                         |
| 14           | 29-mar-14        | 15:00:00 | 30-mar-14   | 2:00:00  | 11               | -35            | -35 | 1          | 630.7                                         |
| <b>TOTAL</b> | <b>2013/2014</b> | <b>=</b> | <b>14</b>   |          |                  |                |     |            |                                               |
| 1            | 30-Apr-2014      | 20:00:00 | 03-may-14   | 11:00:00 | 56               | -35            | -32 | 1          | 484.2                                         |
| 2            | 28-may-14        | 23:00:00 | 29-may-14   | 18:00:00 | 19               | -35            | -33 | 1          | 576.9                                         |
| 3            | 03-jun-14        | 4:00:00  | 04-jun-14   | 6:00:00  | 26               | -35            | -31 | 1          | 650.4                                         |
| 4            | 10-jun-14        | 19:00:00 | 12-jun-14   | 4:00:00  | 33               | -35            | -30 | 1          | 640.8                                         |
| 5            | 13-jul-14        | 18:00:00 | 14-jul-14   | 20:00:00 | 26               | -35            | -31 | 1          | 610.6                                         |
| 6            | 27-jul-14        | 15:00:00 | 29-jul-14   | 10:00:00 | 43               | -35            | -34 | 2          | 509                                           |
| 7            | 30-jul-14        | 17:00:00 | 01-Aug-2014 | 8:00:00  | 39               | -35            | -34 | 2          | 502.6                                         |
| 8            | 05-Aug-2014      | 15:00:00 | 06-Aug-2014 | 10:00:00 | 19               | -35            | -34 | 0          | 474.7                                         |
| 9            | 22-Aug-2014      | 14:00:00 | 23-Aug-2014 | 22:00:00 | 18               | -35            | -32 | 0          | 345                                           |
| 10           | 29-Aug-2014      | 19:00:00 | 30-Aug-2014 | 16:00:00 | 21               | -35            | -30 | 1          | 553.2                                         |
| 11           | 31-Aug-2014      | 15:00:00 | 02-sept-14  | 0:00:00  | 33               | -35            | -30 | 2          | 556.4                                         |
| 12           | 02-sept-14       | 16:00:00 | 03-sept-14  | 20:00:00 | 28               | -35            | -32 | 1          | 449.3                                         |
| 13           | 13-sept-14       | 4:00:00  | 13-sept-14  | 17:00:00 | 13               | -33            | -30 | 0          | 392.8                                         |
| 14           | 26-Jan-2015      | 19:00:00 | 27-Jan-2015 | 10:00:00 | 15               | -32            | -30 | 0          | 296.6                                         |
| 15           | 20-feb-15        | 14:00:00 | 20-feb-15   | 23:00:00 | 9                | -33            | -32 | 0          | 295.2                                         |
| 16           | 23-mar-15        | 12:00:00 | 26-mar-15   | 3:00:00  | 63               | -35            | -30 | 2          | 459.7                                         |
| <b>TOTAL</b> | <b>2014/2015</b> | <b>=</b> | <b>16</b>   |          |                  |                |     |            |                                               |
| 1            | 04-jun-15        | 13:00:00 | 09-jun-15   | 6:00:00  | 66               | -35            | -34 | 2          | 504.6                                         |
| 2            | 08-jul-15        | 6:00:00  | 09-jul-15   | 8:00:00  | 26               | -35            | -35 | 1          | 370                                           |
| 3            | 11-jul-15        | 8:00:00  | 12-jul-15   | 22:00:00 | 38               | -35            | -30 | 2          | 739.6                                         |
| 4            | 26-jul-15        | 2:00:00  | 27-jul-15   | 23:00:00 | 45               | -35            | -33 | 2          | 590.2                                         |
| 5            | 01-Aug-2015      | 5:00:00  | 02-Aug-2015 | 7:00:00  | 26               | -35            | -33 | 0          | 431.6                                         |
| 6            | 05-Aug-2015      | 0:00:00  | 09-Aug-2015 | 10:00:00 | 106              | -35            | -30 | 4          | 1056.6                                        |
| 7            | 21-Aug-2015      | 15:00:00 | 22-Aug-2015 | 0:00:00  | 9                | -35            | -34 | 0          | 411                                           |
| 8            | 25-Aug-2015      | 4:00:00  | 25-Aug-2015 | 23:00:00 | 19               | -35            | -34 | 0          | 438.8                                         |
| 9            | 28-Aug-2015      | 1:00:00  | 29-Aug-2015 | 12:00:00 | 35               | -35            | -34 | 2          | 633.3                                         |
| 10           | 06-sept-15       | 2:00:00  | 07-sept-15  | 16:00:00 | 38               | -35            | -31 | 2          | 523.6                                         |
| 11           | 27-sept-15       | 15:00:00 | 29-sept-15  | 5:00:00  | 38               | -35            | -30 | 0          | 358.6                                         |
| 12           | 30-sept-15       | 16:00:00 | 01-oct-15   | 15:00:00 | 23               | -35            | -30 | 0          | 434.6                                         |
| 13           | 04-oct-15        | 1:00:00  | 05-oct-15   | 6:00:00  | 29               | -35            | -31 | 0          | 392.7                                         |
| 14           | 13-oct-15        | 18:00:00 | 14-oct-15   | 13:00:00 | 19               | -35            | -30 | 0          | 463                                           |
| 15           | 19-oct-15        | 2:00:00  | 19-oct-15   | 18:00:00 | 16               | -34            | -30 | 0          | 397.6                                         |
| 16           | 07-Jan-2016      | 6:00:00  | 08-Jan-2016 | 5:00:00  | 23               | -35            | -30 | 0          | 360.1                                         |
| 17           | 23-Jan-2016      | 16:00:00 | 24-Jan-2016 | 2:00:00  | 10               | -33            | -32 | 0          | 341.8                                         |
| <b>TOTAL</b> | <b>2015/2016</b> | <b>=</b> | <b>17</b>   |          |                  |                |     |            |                                               |

|    |             |          |             |          |    |     |     |   |       |
|----|-------------|----------|-------------|----------|----|-----|-----|---|-------|
| 1  | 05-Apr-2016 | 16:00:00 | 07-Apr-2016 | 3:00:00  | 22 | -35 | -32 | 0 | 479.8 |
| 2  | 14-Apr-2016 | 2:00:00  | 18-Apr-2016 | 1:00:00  | 95 | -35 | -30 | 3 | 589.6 |
| 3  | 22-Apr-2016 | 22:00:00 | 23-Apr-2016 | 23:00:00 | 25 | -35 | -32 | 0 | 469.3 |
| 4  | 01-may-16   | 6:00:00  | 01-may-16   | 20:00:00 | 14 | -35 | -35 | 0 | 288.7 |
| 5  | 10-may-16   | 16:00:00 | 12-may-16   | 6:00:00  | 38 | -35 | -30 | 2 | 636.3 |
| 6  | 14-may-16   | 10:00:00 | 15-may-16   | 2:00:00  | 16 | -35 | -31 | 0 | 410.1 |
| 7  | 02-jun-16   | 19:00:00 | 04-jun-16   | 2:00:00  | 31 | -32 | -30 | 1 | 490.8 |
| 8  | 12-jun-16   | 6:00:00  | 13-jun-16   | 5:00:00  | 23 | -35 | -33 | 0 | 394.7 |
| 9  | 10-jul-16   | 9:00:00  | 11-jul-16   | 11:00:00 | 26 | -35 | -32 | 0 | 407.2 |
| 10 | 13-jul-16   | 0:00:00  | 14-jul-16   | 3:00:00  | 27 | -35 | -30 | 2 | 689.9 |
| 11 | 23-jul-16   | 18:00:00 | 25-jul-16   | 5:00:00  | 35 | -35 | -30 | 1 | 389.6 |
| 12 | 15-Aug-2016 | 23:00:00 | 16-Aug-2016 | 12:00:00 | 13 | -35 | -35 | 0 | 373.2 |
| 13 | 06-oct-16   | 5:00:00  | 07-oct-16   | 6:00:00  | 25 | -35 | -30 | 0 | 324   |
| 14 | 15-oct-16   | 3:00:00  | 16-oct-16   | 10:00:00 | 31 | -35 | -30 | 2 | 597.6 |
| 15 | 03-nov-16   | 12:00:00 | 04-nov-16   | 13:00:00 | 25 | -35 | -31 | 0 | 366.3 |
| 16 | 09-Dec-2016 | 0:00:00  | 09-Dec-2016 | 13:00:00 | 13 | -33 | -32 | 0 | 369   |
| 17 | 10-Dec-2016 | 11:00:00 | 11-Dec-2016 | 15:00:00 | 28 | -35 | -30 | 0 | 341   |
| 18 | 24-Jan-2017 | 2:00:00  | 25-Jan-2017 | 9:00:00  | 28 | -35 | -35 | 0 | 318.7 |
| 19 | 21-feb-17   | 20:00:00 | 23-feb-17   | 11:00:00 | 39 | -35 | -30 | 1 | 363.6 |

**TOTAL 2016/2017 = 19**

|    |             |          |             |          |     |     |     |   |       |
|----|-------------|----------|-------------|----------|-----|-----|-----|---|-------|
| 1  | 19-Apr-2017 | 17:00:00 | 21-Apr-2017 | 2:00:00  | 33  | -35 | -30 | 1 | 495.3 |
| 2  | 06-may-17   | 12:00:00 | 07-may-17   | 14:00:00 | 26  | -35 | -30 | 2 | 656.7 |
| 3  | 10-may-17   | 7:00:00  | 14-may-17   | 12:00:00 | 101 | -35 | -30 | 3 | 727.1 |
| 4  | 15-jun-17   | 13:00:00 | 17-jun-17   | 3:00:00  | 38  | -35 | -30 | 3 | 764.5 |
| 5  | 21-jun-17   | 10:00:00 | 23-jun-17   | 7:00:00  | 45  | -35 | -31 | 3 | 755.1 |
| 6  | 23-jun-17   | 20:00:00 | 27-jun-17   | 0:00:00  | 76  | -35 | -30 | 4 | 918.4 |
| 7  | 23-jul-17   | 0:00:00  | 23-jul-17   | 18:00:00 | 18  | -32 | -31 | 0 | 376   |
| 8  | 08-Aug-2017 | 20:00:00 | 10-Aug-2017 | 9:00:00  | 37  | -35 | -31 | 2 | 569.6 |
| 9  | 18-Aug-2017 | 12:00:00 | 19-Aug-2017 | 1:00:00  | 13  | -35 | -34 | 0 | 448.3 |
| 10 | 22-Aug-2017 | 13:00:00 | 23-Aug-2017 | 2:00:00  | 13  | -35 | -34 | 1 | 515   |
| 11 | 29-sept-17  | 13:00:00 | 30-sept-17  | 17:00:00 | 28  | -35 | -32 | 2 | 664.6 |
| 12 | 04-oct-17   | 5:00:00  | 05-oct-17   | 7:00:00  | 26  | -35 | -32 | 1 | 529.9 |
| 13 | 31-oct-17   | 18:00:00 | 02-nov-17   | 4:00:00  | 34  | -35 | -33 | 0 | 332.5 |
| 14 | 08-Jan-2018 | 9:00:00  | 08-Jan-2018 | 16:00:00 | 7   | -32 | -32 | 0 | 304.4 |
| 15 | 17-mar-18   | 5:00:00  | 17-mar-18   | 22:00:00 | 17  | -35 | -34 | 1 | 570   |

**TOTAL 2017/2018 = 15**

|    |             |          |             |          |    |     |     |   |       |
|----|-------------|----------|-------------|----------|----|-----|-----|---|-------|
| 1  | 10-Apr-2018 | 11:00:00 | 11-Apr-2018 | 20:00:00 | 33 | -35 | -30 | 2 | 564.3 |
| 2  | 05-may-18   | 17:00:00 | 07-may-18   | 10:00:00 | 41 | -35 | -31 | 1 | 388.6 |
| 3  | 28-may-18   | 4:00:00  | 30-may-18   | 0:00:00  | 44 | -35 | -31 | 3 | 754.6 |
| 4  | 09-jun-18   | 2:00:00  | 11-jun-18   | 8:00:00  | 47 | -35 | -30 | 2 | 761.2 |
| 5  | 01-jul-18   | 10:00:00 | 02-jul-18   | 11:00:00 | 25 | -35 | -30 | 0 | 463.8 |
| 6  | 03-jul-18   | 8:00:00  | 06-jul-18   | 12:00:00 | 76 | -35 | -30 | 3 | 715.1 |
| 7  | 06-Aug-2018 | 13:00:00 | 07-Aug-2018 | 5:00:00  | 16 | -35 | -34 | 0 | 463.8 |
| 8  | 17-sept-18  | 4:00:00  | 18-sept-18  | 8:00:00  | 28 | -35 | -32 | 2 | 542   |
| 9  | 27-sept-18  | 2:00:00  | 29-sept-18  | 8:00:00  | 54 | -35 | -33 | 2 | 486.2 |
| 10 | 29-oct-18   | 3:00:00  | 30-oct-18   | 1:00:00  | 22 | -35 | -34 | 0 | 369.7 |
| 11 | 01-nov-18   | 14:00:00 | 02-nov-18   | 13:00:00 | 23 | -35 | -33 | 1 | 559   |
| 12 | 21-feb-19   | 11:00:00 | 21-feb-19   | 22:00:00 | 11 | -35 | -34 | 0 | 293.1 |
| 13 | 30-mar-19   | 15:00:00 | 31-mar-19   | 3:00:00  | 12 | -33 | -32 | 0 | 325.8 |

**TOTAL 2018/2019 = 13**

|   |             |         |             |          |    |     |     |   |       |
|---|-------------|---------|-------------|----------|----|-----|-----|---|-------|
| 1 | 24-Apr-2019 | 4:00:00 | 24-Apr-2019 | 22:00:00 | 18 | -35 | -30 | 0 | 423   |
| 2 | 02-may-19   | 2:00:00 | 04-may-19   | 20:00:00 | 64 | -35 | -34 | 3 | 646.7 |
| 3 | 29-may-19   | 2:00:00 | 31-may-19   | 23:00:00 | 60 | -35 | -30 | 2 | 574.3 |
| 4 | 12-jun-19   | 0:00:00 | 13-jun-19   | 2:00:00  | 26 | -35 | -32 | 1 | 498.9 |

|    |             |          |             |          |    |     |     |   |       |
|----|-------------|----------|-------------|----------|----|-----|-----|---|-------|
| 5  | 24-jun-19   | 2:00:00  | 25-jun-19   | 1:00:00  | 23 | -34 | -30 | 0 | 358.8 |
| 6  | 27-jun-19   | 5:00:00  | 29-jun-19   | 13:00:00 | 56 | -35 | -30 | 1 | 499.7 |
| 7  | 06-jul-19   | 17:00:00 | 07-jul-19   | 12:00:00 | 19 | -35 | -31 | 0 | 353.1 |
| 8  | 20-jul-19   | 23:00:00 | 21-jul-19   | 8:00:00  | 9  | -35 | -35 | 1 | 573.8 |
| 9  | 28-Aug-2019 | 15:00:00 | 29-Aug-2019 | 3:00:00  | 12 | -35 | -35 | 1 | 500.3 |
| 10 | 09-sept-19  | 2:00:00  | 09-sept-19  | 22:00:00 | 20 | -35 | -33 | 0 | 372.7 |
| 11 | 07-oct-19   | 1:00:00  | 07-oct-19   | 10:00:00 | 9  | -31 | -31 | 0 | 270.9 |
| 12 | 14-oct-19   | 1:00:00  | 15-oct-19   | 6:00:00  | 29 | -35 | -30 | 1 | 510   |
| 13 | 15-nov-19   | 22:00:00 | 16-nov-19   | 9:00:00  | 11 | -35 | -31 | 0 | 309.5 |
| 14 | 21-mar-20   | 18:00:00 | 22-mar-20   | 3:00:00  | 9  | -32 | -31 | 0 | 282.8 |

**TOTAL 2019/2020 = 14**

|    |             |          |             |          |    |     |     |   |       |
|----|-------------|----------|-------------|----------|----|-----|-----|---|-------|
| 1  | 23-Apr-2020 | 16:00:00 | 25-Apr-2020 | 9:00:00  | 41 | -35 | -32 | 1 | 444.6 |
| 2  | 15-may-20   | 1:00:00  | 16-may-20   | 4:00:00  | 25 | -35 | -32 | 0 | 291.7 |
| 3  | 19-may-20   | 6:00:00  | 20-may-20   | 8:00:00  | 26 | -35 | -35 | 1 | 304.7 |
| 4  | 29-may-20   | 5:00:00  | 29-may-20   | 18:00:00 | 13 | -32 | -30 | 0 | 352.4 |
| 5  | 11-jun-20   | 10:00:00 | 12-jun-20   | 12:00:00 | 26 | -35 | -32 | 1 | 643.6 |
| 6  | 15-jun-20   | 11:00:00 | 17-jun-20   | 19:00:00 | 56 | -35 | -30 | 3 | 590.5 |
| 10 | 18-jun-20   | 3:00:00  | 19-jun-20   | 15:00:00 | 36 | -35 | -32 | 2 | 631.9 |
| 11 | 20-jun-20   | 11:00:00 | 21-jun-20   | 2:00:00  | 15 | -35 | -32 | 0 | 435   |
| 12 | 22-jun-20   | 3:00:00  | 23-jun-20   | 3:00:00  | 24 | -35 | -32 | 1 | 512.3 |
| 13 | 28-jun-20   | 3:00:00  | 29-jun-20   | 18:00:00 | 39 | -35 | -30 | 2 | 635.2 |
| 14 | 01-jul-20   | 2:00:00  | 01-jul-20   | 17:00:00 | 15 | -35 | -32 | 0 | 374.9 |
| 15 | 03-jul-20   | 6:00:00  | 04-jul-20   | 20:00:00 | 36 | -35 | -32 | 0 | 472.2 |
| 16 | 10-jul-20   | 2:00:00  | 10-jul-20   | 14:00:00 | 12 | -35 | -35 | 0 | 392.1 |
| 17 | 17-jul-20   | 1:00:00  | 19-jul-20   | 13:00:00 | 60 | -35 | -31 | 3 | 555.8 |
| 18 | 01-Aug-2020 | 13:00:00 | 01-Aug-2020 | 22:00:00 | 9  | -35 | -35 | 0 | 468.5 |
| 19 | 24-Aug-2020 | 8:00:00  | 26-Aug-2020 | 1:00:00  | 41 | -35 | -30 | 2 | 564.7 |
| 20 | 28-Jan-2021 | 19:00:00 | 30-Jan-2021 | 9:00:00  | 38 | -35 | -33 | 1 | 425.6 |

**TOTAL 2020/2021 = 20**
